# Supplementary material for: Human ATG3 binding to lipid bilayers: role of lipid geometry, and electric charge
Source: PubMed Central journal article supplement (PMC5688168; doi:10.1038/s41598-017-15057-6), 2017-11-15

## **Supplementary Information**

### **Human ATG3 binding to lipid bilayers: role of lipid geometry, and electric charge**

**Javier H. Hervás, Ane Landajuela, Zuriñe Antón, Anna V. Shnyrova,  
Felix M. Goñi and Alicia Alonso\***

*Instituto Biofisika (CSIC, UPV/EHU) and Departamento de Bioquímica y Biología Molecular,  
Universidad del País Vasco, Bilbao, Spain.*

\*Corresponding author. Email: [alicia.alonso@ehu.eus](mailto:alicia.alonso@ehu.eus)

## Supplementary Figure 1

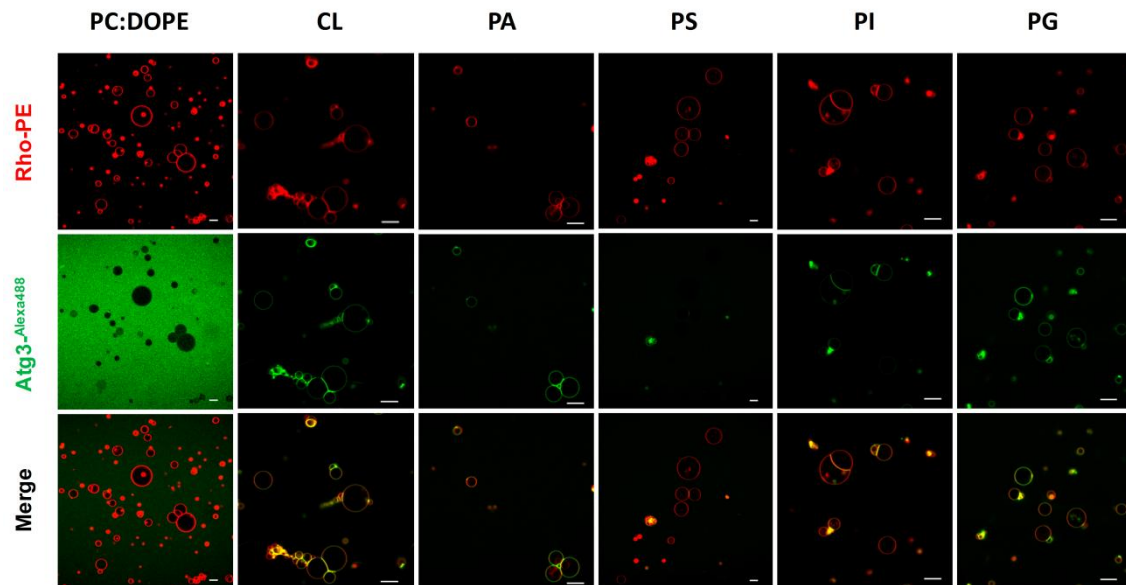

**Figure S1. ATG3 interaction with negatively-charged GUVs.** Different anionic phospholipids are incorporated to GUVs (labeled with Rhodamine-PE) and protein (labeled with Alexa-488) incorporation to them was observed by confocal microscopy. Merge: yellow indicates colocalization of both probes. Scale bars: 10  $\mu\text{m}$ .

## Supplementary Figure 2

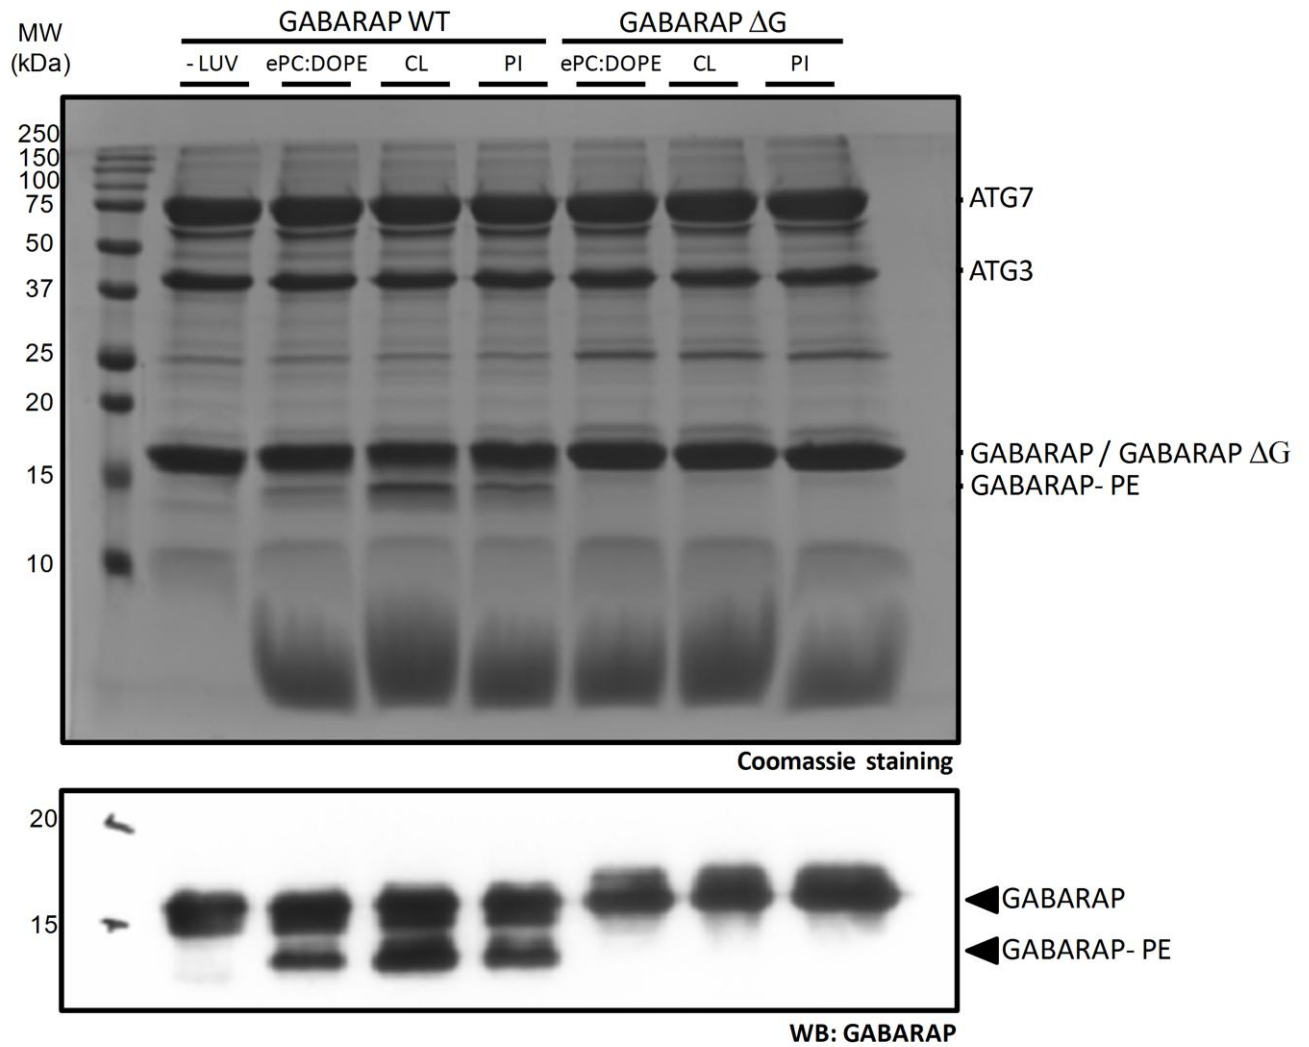

**Figure S2.** Coomassie blue staining (upper panel) and anti-GABARAP Western blotting (lower panel) of the *in vitro* lipitation reaction using different lipid compositions. Lipid compositions are ePC:DOPE (70:30 mol ratio), ePC:DOPE:CL (60:30:10 mol ratio) and ePC:DOPE:PI (50:30:20 mol ratio). Black arrow heads indicate lipidated and non-lipidated forms of GABARAP.

## Supplementary Figure 3

### Figure 3 uncropped gels

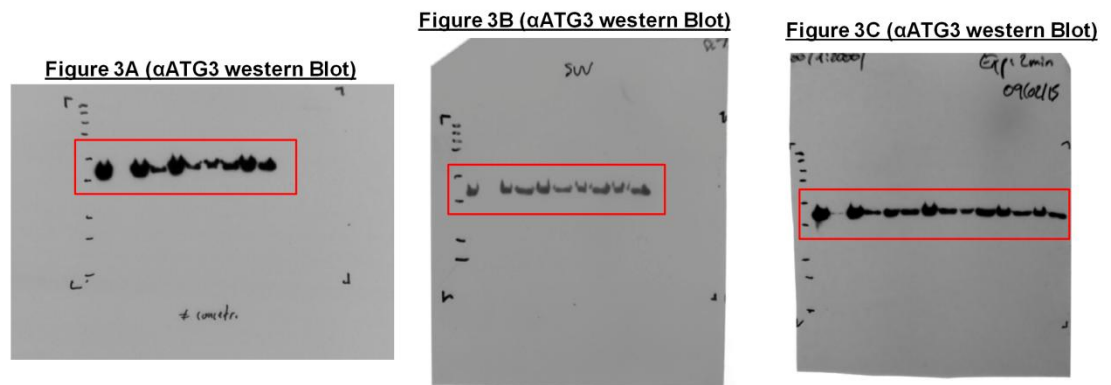

### Figure 8 uncropped gels

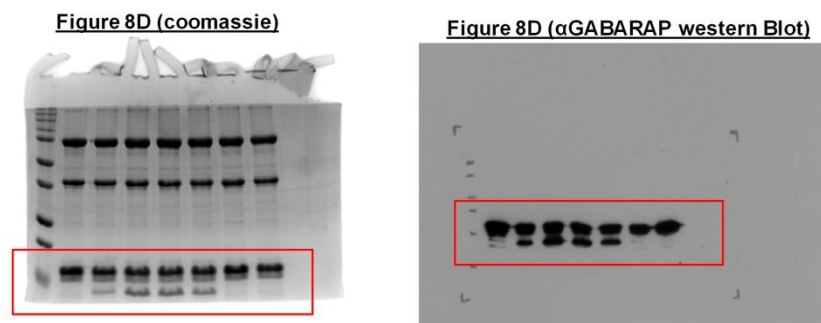

Supplement: 41598_2017_15057_MOESM1_ESM.pdf [file 41598_2017_15057_MOESM1_ESM.pdf]
